**Title:** Rehabilitation clinicians' perspectives of reactive balance training.

**Authors:** David Jagroop,<sup>1</sup> Stephanie Houvardas,<sup>2</sup> Cynthia J Danells,<sup>1,3</sup> Jennifer Kochanowski,<sup>1</sup> Esmé French,<sup>4</sup> Nancy M. Salbach,<sup>1,3</sup> Kristin Musselman,<sup>1,3</sup> Elizabeth L. Inness,<sup>1,2</sup> Avril Mansfield<sup>1,3,5</sup>

**Affiliations:** <sup>1</sup>Toronto Rehabilitation Institute – University Health Network, Toronto, ON, Canada;

<sup>2</sup>Faculty of Kinesiology, University of Toronto, Toronto, ON, Canada; <sup>3</sup>Department of Physical

Therapy, University of Toronto, Toronto, ON, Canada; <sup>4</sup>Northwestern Ontario Regional Stroke

Network, Thunder Bay, ON, Canada; <sup>5</sup>Evaluative Clinical Sciences, Hurvitz Brain Sciences Research

Program, Sunnybrook Research Institute, Toronto, ON, Canada.

**Corresponding author:**

David Jagroop

550 University Avenue Toronto, ON, M5G 2A2

Tel: 416-597-3422 ext 7614

E-mail: [david.jagroop@uhn.ca](mailto:david.jagroop@uhn.ca)

**Word Counts**

Abstract: 173

Manuscript: 5473 (including tables and references)

# Tables: 3

# 18 ABSTRACT

19 **Purpose:** Reactive balance training (RBT) aims to improve reactive balance control. However, because  
20 RBT involves clients losing balance, clinicians may view that it is unsafe or not feasible for some  
21 clients. We aimed to explore how clinicians are specifically implementing RBT to treat balance and  
22 mobility issues.

23 **Materials and methods:** Physiotherapists and kinesiologists across Canada who reported that they  
24 include RBT in their practices were invited to complete telephone interviews about their experience  
25 with RBT. Interviews were transcribed verbatim, and analysed using a deductive thematic analysis.

26 **Results:** Ten participants completed telephone interviews, which lasted between 30-60 minutes.  
27 Participants were primarily working in a hospital setting (inpatient rehabilitation (n=3); outpatient  
28 rehabilitation (n=2), and were treating those with neurological disorders (n=5). Four main themes were  
29 identified: 1) there is variability in RBT approaches; 2) knowledge can be a barrier and facilitator to  
30 RBT; 3) reactive balance control is viewed as an advanced skill; and 4) RBT experience builds  
31 confidence.

32 **Conclusions:** Our findings suggest a need for resources to make clinical implementation of RBT more  
33 feasible.

34 **Key words (5-8):** Physical Therapists; Qualitative Research; Health Resources; Postural Balance;  
35 Accidental Falls; Professional Practice Gaps.

## INTRODUCTION

In Canada, falls are the most common cause of injury that require hospitalizations [1]. A fall occurs when there is a loss of balance, where individuals lose control of the relationship between their centre of mass and base of support. The ability to prevent a fall following a loss of balance depends on effective reactive balance control.

Reactive balance training (RBT) is the only type of exercise that has been shown to significantly improve reactive balance control [2-7]. RBT is a novel type of exercise that allows individuals to experience an intentional loss of balance, with the use of repeated balance perturbations in a safe environment. Those that complete RBT demonstrate improved control of stepping and reach-to-grasp reactions [2,7-13], and report fewer falls in daily life [14].

Clinicians are uncertain whether RBT is feasible in practice, due to the perception that RBT requires specialized moving platforms [2] or expensive programmable treadmills [15]. Our previous study reported that 75% of Canadian physiotherapists and kinesiologists who treat people for balance problems use RBT in their practices [16]. However, from that survey study it was unclear how clinicians were specifically implementing RBT. Additionally, some responses to the questionnaire suggested that clinicians equated volitional step training with RBT. There were also mixed opinions regarding the equipment needed for RBT. Thus, qualitative methods are warranted to gain further in-depth understanding of clinician's use of RBT in practice. Therefore, the primary purpose of the current study was to explore how clinicians are specifically implementing RBT to treat balance and mobility issues. The secondary purpose was to gain a more in-depth understanding of the underlying barriers and facilitators to implementing RBT in practice.

## METHODS

The current study employed a qualitative descriptive approach using interviews to gain an in depth understanding of clinician's use of RBT in practice. The standards for reporting qualitative research

were followed [17]. Physiotherapists and kinesiologists that treat clients in any setting for problems with balance and mobility were invited to participate in the study. Respondents to our previous nationwide survey study [16] who expressed an interest in participating in future research and who reported that they conducted RBT in their practices were invited to participate. Results from this study also informed our sampling approach; that is, we aimed to ensure our study sample was representative of the population of Canadian clinicians who treat people with balance problems in terms of, gender identity (80% women; 20% men), profession (80% physiotherapist; 20% kinesiologist), and number of years of experience (at least n=2 from each category). After providing informed consent, participants were asked to complete a short screening questionnaire about their profession, practice setting, client population, and use of RBT in practice.

One-on-one telephone interviews were conducted using a semi-structured interview guide, which was developed based on findings from our previous work [16] (**table 1**). For familiarization purposes, participants were sent a list of the interview questions approximately one week before the scheduled interview. Participants were invited to share additional thoughts, if any, after the interview via e-mail. Interviews were conducted by author DJ, who has previous experience in RBT research, and conducting interviews and focus groups.

Telephone interviews were audio recorded and later transcribed verbatim. Field notes provided additional context to the responses, and thoughts that were shared post-interview (via e-mail) were added to the interview transcripts. A deductive thematic analysis of the transcripts was performed using a codebook, which included codes that had emerged from previous work [16]. As our previous study used a questionnaire to learn about clinical practices around RBT, a deductive thematic analysis was employed to gain a more in-depth understanding of current practices [18]. One transcript was selected and coded individually by 3 coders (AM, DJ, and SH). The coders selected quotes that supported codes. The 3 coders then met as a group to discuss their findings, as well as any discrepancies with coding (i.e., which code was most appropriate for a particular quote). All coders reached a mutual

consensus on the revised codebook, and the remaining transcripts were analyzed by the 3 coders. The final codebook was then revised and condensed into major theme summaries. Finally, an executive summary of the key findings was created.

## RESULTS

Characteristics of the ten participants are presented in **table 2**. Interviews typically lasted between 30 to 60 minutes. One interview had technical difficulties with recording audio, and as a result, the latter half of the interview was not recorded. Field notes by the interviewer were used in place of the missing portion of the interview. Two participants provided additional comments via e-mail, which were added to their transcripts. A total of 4 main themes were identified from the interviews: 1) there is variability in RBT approaches; 2) knowledge can be both a barrier and facilitator to RBT; 3) reactive balance control is viewed as an advanced skill; and 4) RBT experience builds confidence. Verbatim quotes were used to support study findings. Themes, and sub-themes from the interviews are presented in **table 3**.

### There is variability in RBT approaches

#### *Participants' definition of RBT*

Most participants defined RBT similar to “*the use of internally or externally executed perturbations to challenge a variety of reactions that simulates daily balance scenarios or specific balance deficits*” (Participant I). However, some considered that RBT involves volitional step training, reacting to other stimuli (e.g., visual), or training to “maintain” balance when experiencing external perturbations rather than practicing reactions to recover balance after the perturbation.

*“I’m standing around them... and do little perturbations, like a little push, they don’t know what direction its coming from... it’s from the side, the front, the back.... And they have to maintain their balance” (Participant B; emphasis added).*

111

## 112 ***Assessment approaches***

113 Although most participants understood that RBT involves training reactive balance control, participants  
114 did not use a standardized reactive balance assessment. The most commonly used assessment tools  
115 were the Berg Balance Scale and the Timed Up and Go. A few participants highlighted that existing  
116 clinical balance assessment tools were limited in their ability to assess reactive balance control.

117 *“...you could have two clients that both get 56 out of 56 on their Berg balance, but one might*  
118 *be way better with reactive balance than the other.” (Participant B).*

119 As they were not aware of a formal tool to assess reactive balance control, a few participants  
120 improvised and created their own methods or used movement observation as a way to assess balance  
121 problems.

122 *“I could put the client in a situation like you know just standing on a carpet, or standing with*  
123 *their eyes closed. So changing, you know, assessing the same movement in the context of*  
124 *different stimuli or different conditions.” (Participant H).*

125

## 126 ***Treatment approaches***

127 Most participants used low-tech methods to cause clients to lose balance; for example, they used  
128 manual (external forces) or internal perturbations (client loses balance while completing a challenging  
129 balance task), with/without equipment that is typically found in a rehabilitation setting. Participants  
130 also mentioned incorporating games to make RBT more enjoyable. Some participants expressed  
131 interest in acquiring specialized equipment to provide perturbations (e.g., commercially available  
132 moving platforms), but also reported that lack of space and funding were barriers to acquiring such  
133 equipment. Others felt they had adequate equipment to provide RBT. Some participants made their  
134 own equipment such as moveable platforms, or used commonly found equipment (e.g., resistance  
135 bands) to evoke balance reactions. One participant’s institution had dedicated space for RBT, but

difficulties scheduling access to the space posed challenges in conducting RBT. Participants expressed two major conflicts with incorporating RBT into their treatment plan: 1) discharge planning within their setting, and 2) client goals. With discharge planning, participants felt that their setting prioritized functional outcomes, which hindered their ability to do RBT. Indeed, some participants also mentioned that balance, in general, is not prioritized in therapy; rather, the main focus is independence with activities of daily living, and walking with an aid.

*“I’m still working on explaining to our management team that balance is a priority to be part of that safe and functional discharge” (Participant I).*

Many participants felt that clients also do not prioritize balance training.

*“Certainly we have clients who sometimes think like “this is not what we are here for, this is a waste of my time, get me walking and then I’m good” ...The balance part tends to fall away in favor of the, you know, is their walking speed at a safe community level or distance and things like that” (Participant I).*

## **Knowledge can be both a barrier and facilitator to RBT**

Few participants expressed that they did not have experience and training in providing RBT. Most participants did not receive formal training with RBT in their professional education. Consequently, participants did not always know how and when to use RBT optimally. Participants were particularly unsure about how to prescribe RBT, when to conduct RBT in therapy, which clients were appropriate for RBT, and what RBT methods would be best for their clients.

*“What’s the right amount and in what stage in their recovery can we use it? Should we just be doing internal? Should we just be doing external? Should we do a combination? Should we be doing strength, aerobics with it or just static, dynamic? I think that’s the part as a clinician I don’t have that answer... I think the challenging part is, how do you make it fit for the client,*

*their abilities and actually challenge them enough that it makes a difference and they're going to improve?" (Participant F).*

Participants wanted better ways to assess reactive balance control, and more education on how to prescribe RBT. Some participants noted that their colleagues lack awareness of RBT.

*"We need more education on it, or more creative ways to use it.... And I think the reason why it isn't (implemented more in rehabilitation) is because not a lot of people know about it." (Participant D).*

In contrast, three participants felt that they had a strong background in neuroscience, motor control, and/or motor learning. These participants reported that this knowledge gained from their graduate and undergraduate education helped them better understand the principles of RBT and the importance of improving reactive balance control.

*"Knowledge of motor control, motor learning, how skills are acquired, that kind of knowledge has helped me immensely understand reactive balance training. I did go back to school and did a Master's degree where I did study balance training and motor skill acquisition and that helped me immensely understanding what I had been doing for the last 6 years. So more education certainly helped me understand it and helped me understand why I was doing some of the things I was doing at the clinic." (Participant C).*

While most participants noted that lack of knowledge was a barrier to RBT, and better education and training around RBT could improve implementation, one participant who was familiar with RBT research reported this as a barrier to implementation. This participant felt that the equipment-based RBT approaches used in research were not feasible in clinical practice, and that the participants included in RBT studies did not reflect the complexity of her clientele.

*"When I read the studies on it, I believe researchers are not targeting anyone who looks like my patients, and that's why I'm always in this dilemma... when the researcher shares in that study the demographics of the patients, my patients don't look like those patients. Another barrier,*



*you cannot do exactly what you guys are doing in a lab, in a clinic, because we don't even have close to the same equipment... it's not the same.” (Participant J).*

## **Reactive balance control is viewed as an advanced skill**

Participants often viewed reactive balance control as an advanced skill. Consequently, many participants felt that RBT is not appropriate for lower-functioning clients (i.e., those with low motor function and/or cognitive function). Participants prioritized re-training function such as sitting or quiet standing balance with these types of clients, and tended to conduct RBT towards the end of clients' treatment programs. This often meant that they 'ran out of time' to do RBT as clients were often discharged before they were ready for more 'advanced' balance training.

*“I would like to say in a perfect world I would do a perturbed balance assessment on everyone before I create their balance program. But the reality is that most of my people would not be appropriate for that really formal kind of balance training or balance assessments when they first arrive because they simply can't even stand up from a chair without assistance.”*  
*(Participant I).*

In contrast, some participants mentioned that RBT should be done earlier in therapy rather than waiting until function is improved, and should also be used as a preventative therapy for those who do not yet have major balance problems/falls.

Participants frequently expressed that, since reactive balance control is an advanced skill, it is not appropriate for home exercise. Likewise, many participants felt RBT needs to be face-to-face and one-on-one; the need to constantly closely interact with the client during RBT was seen as a barrier.

*“...it ties you up with that client, you just can't give them something and walk away, so it has to be one-on-one...you have to be with the client there” (Participant E).*

## **Safety harnesses**

## Perspectives of reactive balance training

210 Participants expressed concern conducting RBT safely, particularly with lower-functioning clients.  
 211 Participants that had access to a safety harness stated that they used the harness to prevent the client  
 212 from falling to the floor. However, some participants noted that they would sometimes only use this  
 213 system in the beginning of RBT, and then later progress to training without it.

214 *“I don’t do harnesses unless I’m doing that really firm push and if it’s usually in their early*  
 215 *stages where they’re a little bit more fearful and I don’t know if they’re going to lose their*  
 216 *balance, so I like to be safe. After I know they can do it we get rid of the harnesses.”*  
 217 *(Participant F).*

218 A few participants felt that the safety harness either changed the client’s balance reactions, or felt that  
 219 clients became too reliant on it and would be afraid to train without it.

220 *“I really rarely use that with my clients ‘cause I feel like it actually changes the way they are*  
 221 *receiving the input. So they ended up relying on the harness and not actually relying on how,*  
 222 *um, how their own proprioception or weight-bearing should be providing feedback to the*  
 223 *brain.” (Participant I).*

224

### 225 **Human resources**

226 Most participants did not have access to a safety harness system, and as an alternative, either did RBT  
 227 in parallel bars or had another individual (e.g., another clinician or a therapy assistant) assist to spot the  
 228 client. The need for another person to assist with RBT presented a barrier; participants reported  
 229 difficulty with scheduling assistants during training times. Furthermore, as reactive balance control was  
 230 viewed as an advanced skill, and therefore that they viewed RBT as complex, participants did not feel  
 231 comfortable delegating RBT entirely to a therapy assistant.

232

### 233 **RBT experience builds confidence in both the client and therapist**

Some participants expressed that they were apprehensive and fearful about doing RBT, specifically external perturbations; however, practice increased their self-confidence and self-efficacy to do it with more clients.

*“So I think with each person you feel like a little more confident. Maybe a little bit more like hey, I do have a good sense of things and I can be a little more creative on how I challenge this person or make what we’re doing in this really artificial setting relevant to their everyday life, which would help” (Participant A)*

Likewise, participants reported that clients often expressed apprehension, fear, and anxiety, but they also acknowledged the benefits of RBT and enjoyed the training. Some participants noted that RBT improves clients’ self-efficacy because they experience a sense of achievement from doing something challenging.

*“Reactive balance training, if it’s done well, can give the client that’s doing it a feeling of achievement and a feeling of success that they attempted something that was difficult and had some success in it, and that can drive sort of further success and further progress in rehabilitation” (Participant C).*

Because of clients’ fear and anxiety with doing RBT, the trust between clinician and client was also noted to be important.

*“I think building rapport which is something I felt that I’ve done really well with my clients in explaining the purpose of it... so they understand like the importance and how it’s going to get them to where they want to be... um, then, just having that support makes the engagement with them a lot better” (Participant D).*

## DISCUSSION

With a goal of increasing clinical uptake of this important therapy, the current study explored how clinicians use RBT to treat balance issues, and their perspectives on implementing RBT in practice. We found that there is variability in definitions and approaches to RBT, knowledge can be both a barrier and facilitator to RBT, reactive balance control is viewed as an advanced skill, and experience with RBT can improve confidence for therapists and clients.

Reactive balance training involves participant repeatedly experiencing loss of so that they can practice, and improve control of, balance reactions. However, findings from our previous study [16] and the current study suggest that some participants consider RBT to be volitional step training, reacting to other stimuli (e.g., visual stimuli), or practicing maintaining rather than recovering balance after external perturbations. This finding highlights the need for researchers to clearly report the ‘active ingredients’ of their interventions, using checklists such as the Template for Intervention Description and Replication [20]. Likewise, clinicians are responsible for delivering evidence-based interventions that, as closely as possible, replicate the intervention that was studied [21]. Researchers should develop clinician-friendly training guidelines to aid in this clinical implementation. Furthermore, while there is no evidence that activities such as volitional step training can improve reactive balance control [22], reactive and volitional step training have not been directly compared [23]. Since volitional step training is used by clinicians, and is likely more feasible to implement than RBT, there is likely value in studying the effect of volitional step training on reactive balance control.

Interestingly, one participant viewed knowledge of RBT research as a barrier to clinical implementation. The two predominant reasons being that they perceived: 1) RBT research subjects were less medically complex and higher functioning than those seen in clinical practice; and 2) RBT research uses high-tech equipment that is not available for clinical use. Likewise, many participants felt that reactive balance control is an advanced skill, and therefore RBT is not appropriate for lower-functioning clients. Previous work has found that, while clinicians recognize the need for challenging balance exercises, clinicians are unlikely to prescribe such challenging exercises, especially in group

283 settings, due to concerns of clients falling [24]. As a result, clients tend not to exercise at or near the  
 284 limits of postural stability [25]. This finding highlights the need to include study participants with a  
 285 range of medical and functional characteristics and, when diverse research participants are included, to  
 286 more clearly report the diversity of these characteristics (e.g., by reporting ranges for baseline  
 287 assessments, in addition to means and standard deviations). This finding also highlights the need for  
 288 clinically-feasible training approaches to be used in clinical trials of RBT. Consistent with our previous  
 289 survey study, participants disagreed as to whether specialized equipment is required for RBT [16].  
 290 Participants mentioned that being creative and improvising with equipment that was already available  
 291 in clinic enabled RBT, without need for high-tech equipment. Several research studies have  
 292 demonstrated that RBT can be conducted using internal and/or manual perturbations with the use of  
 293 low-tech or no equipment [7-9,11,26-28].

294 Participants reported limitations of existing standardized tools for assessing reactive balance  
 295 control, and consequently used informal observation of clients' balance to inform treatment.  
 296 Assessments such as the Berg Balance Scale and Timed Up and Go were often used by participants in  
 297 our study, and are commonly used in other settings [29-31]. However, these tools do not include items  
 298 related to reactive balance control, and it seems that participants were unaware of tools such as the  
 299 Balance Evaluation Systems Test (BEST) [32] or the Performance Oriented Mobility Assessment  
 300 (POMA) [33], which do include reactive balance control items. This finding is consistent with other  
 301 studies showing that reactive balance control is assessed infrequently in clinical practice [31], and that  
 302 rehabilitation clinicians do not often use standardized tools with reactive balance control components,  
 303 such as the BEST or POMA, to assess balance control [34]. When clinicians do assess reactive balance  
 304 control, it is usually by movement observation rather than using a standardized tool [35].

305 Participants' uncertainties with using RBT in practice fostered apprehensive feelings,  
 306 particularly with the use of external perturbations. Conversely, participants noted that experience  
 307 increased confidence in RBT. Therefore, if therapists consistently include RBT in routine practice, this

can build confidence and self-efficacy [36]. Participants also mentioned their clients' feelings of apprehension, fear, and anxiety, but also feelings of enjoyment and improved self-efficacy as the training progressed. Although clients' feelings about RBT were reported indirectly, these reports are consistent with Pak and colleagues [37]; which, also found that client's were able to overcome their fear and anxiety about reactive balance assessments, due to their trust in their therapist. Pak et al. [37] and our current study emphasize the importance of building trust with clients, creating a positive rapport, and applying a graded approach in order to find an appropriate challenge for each client [38]. Having the client involved in the training process, and listening to their preferences can help promote feelings of success and ultimately enhance the overall RBT experience for both the client and therapist [38,39].

## **LIMITATIONS**

This study investigated the perspectives of rehabilitation clinicians that use a very specific type of balance training (RBT). Although purposeful sampling was used to seek those that conduct RBT, these individuals may have a greater interest in this training, and may be more inclined to participate to share their positive experiences. Participants also mentioned their clients' perspective of RBT; these perspectives might not actually represent client perspectives.

## **CONCLUSION**

Overall, these findings can support implementation strategies to increase the use of RBT in practice, which in turn, can reduce the risk of falls across multiple populations. Specifically, the study findings suggest a need for: 1) guidelines that clearly define the 'active ingredients' of RBT; 2) educational tools to guide use of RBT in practice (e.g., when to use RBT and with which clients); and 3) trust between the therapist and client when conducting RBT.

## **FUNDING**

This study is supported by the Heart and Stroke Foundation Canadian Partnership for Stroke Recovery. AM held a New Investigator Award from the Canadian Institutes of Health Research (MSH-141983). NMS holds a Heart & Stroke Foundation Mid-Career Investigator award. We also acknowledge the support of the Toronto Rehabilitation Institute; equipment and space have been funded with grants from the Canada Foundation for Innovation, Ontario Innovation Trust, and the Ministry of Research and Innovation. These funding sources had no role in the design of this study and will not have any role during its execution, analysis, interpretation of the data, or decision to submit results.

## **DECLARATION OF INTERESTS**

Results from this study will inform the development of a reactive balance training toolkit, which is expected to be monetized.

## REFERENCES

1. Canadian Institute for Health Information. Injury Hospitalizations and Socio-Economic Status. Factors influencing health: analysis in brief. 2010.
2. Mansfield A, Peters AL, Liu BA, et al. Effect of a perturbation-based balance training program on compensatory stepping and grasping reactions in older adults: a randomized controlled trial. *Phys. Ther.* 2010;90(4):476-491.
3. Pai Y-C, Yang F, Bhatt T, et al. Learning from laboratory-induced falling: long-term motor retention among older adults. *Age.* 2014;36(3):9640.
4. Bhatt T, Yang F, Pai Y-C. Learning to resist gait-slip falls: long-term retention in community-dwelling older adults. *Arch. Phys. M.* 2012;93(4):557-564.
5. Bhatt T, Yang F, Pai Y-C. Learning From Falling: Retention of Fall Resisting Behavior Derived From One Episode of Laboratory-Induced-Slip Training. *J. Am. Geriatr. Soc.* 2011;59(12):2392.
6. Bhatt T, Pai Y. Generalization of gait adaptation for fall prevention: from moveable platform to slippery floor. *J. Neurophysiol.* 2009;101(2):948-957.
7. Mansfield A, Aquil A, Danells CJ, et al. Does perturbation-based balance training prevent falls among individuals with chronic stroke? A randomised controlled trial. *BMJ open.* 2018;8(8):e021510.
8. Schinkel-Ivy A, Huntley AH, Aquil A, et al. Does perturbation-based balance training improve control of reactive stepping in individuals with chronic stroke? *J. Stroke Cerebrovasc. Dis.* 2019;28(4):935-943.
9. Marigold DS, Eng JJ, Dawson AS, et al. Exercise leads to faster postural reflexes, improved balance and mobility, and fewer falls in older persons with chronic stroke. *J. Am. Geriatr. Soc.* 2005;53(3):416-423.



## Perspectives of reactive balance training

- 368 10. Handelzalts S, Kenner-Furman M, Gray G, et al. Effects of perturbation-based balance training  
369 in subacute persons with stroke: a randomized controlled trial. *Neurorehabil. Neural. Repair.*  
370 2019;33(3):213-224.
- 371 11. Giardini M, Nardone A, Godi M, et al. Instrumental or physical-exercise rehabilitation of  
372 balance improves both balance and gait in Parkinson's disease. *Neural Plast.* 2018;2018.
- 373 12. Parijat P, Lockhart TE. Effects of moveable platform training in preventing slip-induced falls in  
374 older adults. *Ann. Biomed. Eng.* 2012;40(5):1111-1121.
- 375 13. Okubo Y, Sturnieks DL, Brodie MA, et al. Effect of reactive balance training involving  
376 repeated slips and trips on balance recovery among older adults: a blinded randomized  
377 controlled trial. *The Journals of Gerontology: Series A.* 2019;74(9):1489-1496.
- 378 14. Mansfield A, Wong JS, Bryce J, et al. Does perturbation-based balance training prevent falls?  
379 Systematic review and meta-analysis of preliminary randomized controlled trials. *Phys. Ther.*  
380 2015;95(5):700-709.
- 381 15. Rosenblatt NJ, Marone J, Grabiner MD. Preventing trip-related falls by community dwelling  
382 adults: a prospective study. *J. Am. Geriatr. Soc.* 2013;61(9):1629-1631.
- 383 16. Mansfield A, Danells CJ, Inness EL, et al. A survey of Canadian healthcare professionals'  
384 practices regarding reactive balance training. *Physiother. Theory Pract.* 2019:1-14.
- 385 17. O'Brien BC, Harris IB, Beckman TJ, et al. Standards for reporting qualitative research: a  
386 synthesis of recommendations. *Acad. Med.* 2014;89(9):1245-1251.
- 387 18. Braun V, Clarke V. Using thematic analysis in psychology. *Qual. Res. Psychol.* 2006;3(2):77-  
388 101.
- 389 19. Jöbges M, Heuschkel G, Pretzel C, et al. Repetitive training of compensatory steps: a  
390 therapeutic approach for postural instability in Parkinson's disease. *J. Neurol. Neurosurg.*  
391 *Psychiat.* 2004;75(12):1682-1687.

- 392 20. Hoffmann TC, Glasziou PP, Boutron I, et al. Better reporting of interventions: template for  
393 intervention description and replication (TIDieR) checklist and guide. *Bmj*. 2014;348.
- 394 21. Toomey E, Hardeman W. Addressing intervention fidelity within physical therapy research and  
395 clinical practice. *J. Orthop. Sports Phys. Ther.* 2017;47(12):895-898.
- 396 22. Mansfield A, Peters AL, Liu BA, et al. A perturbation-based balance training program for older  
397 adults: study protocol for a randomised controlled trial. *BMC geriatrics*. 2007;7(1):12.
- 398 23. Okubo Y, Schoene D, Lord SR. Step training improves reaction time, gait and balance and  
399 reduces falls in older people: a systematic review and meta-analysis. *Br. J. Sports Med.*  
400 2017;51(7):586-593.
- 401 24. Haas R, Maloney S, Pausenberger E, et al. Clinical decision making in exercise prescription for  
402 fall prevention. *Phys. Ther.* 2012;92(5):666-679.
- 403 25. Farlie MK, Keating JL, Molloy E, et al. The Balance Intensity Scales for Therapists and  
404 Exercisers Measure Balance Exercise Intensity in Older Adults: Initial Validation Using Rasch  
405 Analysis. *Phys. Ther.* 2019;99(10):1394-1404.
- 406 26. Halvarsson A, Franzén E, Farén E, et al. Long-term effects of new progressive group balance  
407 training for elderly people with increased risk of falling—a randomized controlled trial. *Clin.*  
408 *Rehabil.* 2013;27(5):450-458.
- 409 27. Halvarsson A, Olsson E, Farén E, et al. Effects of new, individually adjusted, progressive  
410 balance group training for elderly people with fear of falling and tend to fall: a randomized  
411 controlled trial. *Clin. Rehabil.* 2011;25(11):1021-1031.
- 412 28. Smania N, Corato E, Tinazzi M, et al. Effect of balance training on postural instability in  
413 patients with idiopathic Parkinson's disease. *Neurorehabil. Neural. Repair.* 2010;24(9):826-834.
- 414 29. Sibley KM, Straus SE, Inness EL, et al. Balance assessment practices and use of standardized  
415 balance measures among Ontario physical therapists. *Phys. Ther.* 2011;91(11):1583-1591.

## Perspectives of reactive balance training

- 416 30. Jette DU, Halbert J, Iverson C, et al. Use of standardized outcome measures in physical  
417 therapist practice: perceptions and applications. *Phys. Ther.* 2009;89(2):125-135.
- 418 31. Oates A, Arnold C, Walker-Johnston J, et al. Balance assessment practices of Saskatchewan  
419 physiotherapists: a brief report of survey findings. *Physiother. Can.* 2017;69(3):217-225.
- 420 32. Horak FB, Wrisley DM, Frank J. The balance evaluation systems test (BESTest) to differentiate  
421 balance deficits. *Phys. Ther.* 2009;89(5):484-498.
- 422 33. Tinetti ME. Performance-oriented assessment of mobility problems in elderly patients. *J. Am.*  
423 *Geriatr. Soc.* 1986;34(2):119-126.
- 424 34. Gervais T, Burling N, Krull J, et al. Understanding approaches to balance assessment in  
425 physical therapy practice for elderly inpatients of a rehabilitation hospital. *Physiother. Can.*  
426 2014;66(1):6-14.
- 427 35. Sibley K, Inness E, Straus S, et al. Clinical assessment of reactive postural control among  
428 physiotherapists in Ontario, Canada. *Gait & posture.* 2013;38(4):1026-1031.
- 429 36. Bandura A. Self-efficacy: toward a unifying theory of behavioral change. *Psychol. Rev.*  
430 1977;84(2):191.
- 431 37. Pak P, Jawed H, Tirone C, et al. Incorporating research technology into the clinical assessment  
432 of balance and mobility: perspectives of physiotherapists and people with stroke. *Physiother.*  
433 *Can.* 2015;67(1):1-8.
- 434 38. Reunanen MAT, Talvitie U, Järvikoski A, et al. Client's role and participation in stroke  
435 physiotherapy encounters: an observational study. *Eur. J. Physiother.* 2016;18(4):210-217.
- 436 39. Wressle E, Eeg-Olofsson A-M, Marcusson J, et al. Improved client participation in the  
437 rehabilitation process using a client-centred goal formulation structure. *J. Rehabil. Med.*  
438 2002;34(1):5-11.

439 **Table 1: Interview guide**

| Question type | Question                                                                                                                            |
|---------------|-------------------------------------------------------------------------------------------------------------------------------------|
| Introduction  | 1. Can you describe your practice?                                                                                                  |
| Transition    | 2. Please describe your understanding of the term, reactive balance training (also known as “perturbation-based balance training”). |
|               | 3. What are your thoughts about reactive balance training?                                                                          |
| Key           | 4. How would you describe your experience of using reactive balance training?                                                       |
|               | 5. What are some of the challenges you’ve experienced with reactive balance training?                                               |
|               | 6. Can you describe the sorts of things, if any, that have helped you to do reactive balance training?                              |
|               | 7. How do you think reactive balance training has impacted your practice and/or your clients?                                       |
| Conclusion    | 8. How do you think your use of reactive balance training might change in the future?                                               |
|               | 9. Is there anything that we have not discussed that you would like to tell me more about?                                          |
|               | 10. Is there anything you would like to ask me?                                                                                     |

440

441 **Table 2: Participant characteristics.** Values presented as number of responses in each category.

| Participant | Profession      | Gender<br>identity | Age<br>(years) | Highest level<br>of education | Professional<br>experience<br>(years) | Location             | Setting                       | Primary<br>area of<br>practice |
|-------------|-----------------|--------------------|----------------|-------------------------------|---------------------------------------|----------------------|-------------------------------|--------------------------------|
| A           | Physiotherapist | Female             | 31-40          | Professional<br>master's      | 6-10                                  | Central<br>Canada    | In-patient<br>rehabilitation  | Neurological                   |
| B           | Physiotherapist | Female             | 31-40          | Bachelor's                    | 6-10                                  | Prairie<br>provinces | Private practice              | Neurological                   |
| C           | Kinesiologist   | Male               | 41-50          | Thesis-based<br>master's      | ≥ 20                                  | Central<br>Canada    | Private practice              | Neurological                   |
| D           | Kinesiologist   | Female             | ≤ 30           | Bachelor's                    | ≤ 5                                   | British<br>Columbia  | Home/community<br>care        | Neurological                   |
| E           | Kinesiologist   | Female             | 51-60          | Thesis-based<br>master's      | ≥ 20                                  | Central<br>Canada    | Private practice              | Orthopaedic                    |
| F           | Physiotherapist | Female             | 31-40          | Professional<br>master's      | 6-10                                  | Atlantic<br>region   | Out-patient<br>rehabilitation | Neurological                   |

|   |                 |        |       |                          |           |                      |                               |             |
|---|-----------------|--------|-------|--------------------------|-----------|----------------------|-------------------------------|-------------|
| G | Physiotherapist | Female | 31-40 | Bachelor's               | 16-20     | Prairie<br>provinces | In-patient<br>rehabilitation  | Geriatric   |
| H | Physiotherapist | Male   | 31-40 | Professional<br>master's | $\leq 5$  | Central<br>Canada    | Out-patient<br>rehabilitation | Orthopaedic |
| I | Physiotherapist | Female | 31-40 | Professional<br>master's | 11-15     | Prairie<br>provinces | In-patient<br>rehabilitation  | Geriatric   |
| J | Physiotherapist | Female | 51-60 | Professional<br>master's | $\geq 20$ | Outside<br>Canada    | Private practice              | Geriatric   |

443 **Table 3: Common themes, categories and sub-categories from interviews**

| Themes                                               | Categories                                                                          | Sub-categories                                                                                                                                                                                                                                                                                                                                                |
|------------------------------------------------------|-------------------------------------------------------------------------------------|---------------------------------------------------------------------------------------------------------------------------------------------------------------------------------------------------------------------------------------------------------------------------------------------------------------------------------------------------------------|
| 1. There is variability in RBT approaches            | <ul style="list-style-type: none"> <li>• Participants' definition of RBT</li> </ul> | <ul style="list-style-type: none"> <li>• High-level balance training vs evoking balance reactions</li> </ul>                                                                                                                                                                                                                                                  |
|                                                      | <ul style="list-style-type: none"> <li>• Assessment approaches</li> </ul>           | <ul style="list-style-type: none"> <li>• Limitations of current assessment strategies</li> </ul>                                                                                                                                                                                                                                                              |
|                                                      | <ul style="list-style-type: none"> <li>• Treatment approaches</li> </ul>            | <ul style="list-style-type: none"> <li>• RBT should be done face-to-face and one-on-one</li> <li>• Lack of sufficient space</li> <li>• Low-tech equipment used</li> <li>• "You can get creative"</li> <li>• Enjoyment for both the client and therapist</li> <li>• Desire to have high-tech equipment</li> <li>• Conflicts with treatment planning</li> </ul> |
| 2. Knowledge can be a barrier and facilitator to RBT | <ul style="list-style-type: none"> <li>• Lack of RBT knowledge/skills</li> </ul>    | <ul style="list-style-type: none"> <li>• Uncertainty with applying RBT to practice               <ul style="list-style-type: none"> <li>○ Appropriate clientele</li> <li>○ When to introduce it into care</li> <li>○ RBT prescription</li> <li>○ Best methods to conduct RBT</li> </ul> </li> </ul>                                                           |

|                                                            |                                                                                                                                        |                                                                                                                                                                                                                  |
|------------------------------------------------------------|----------------------------------------------------------------------------------------------------------------------------------------|------------------------------------------------------------------------------------------------------------------------------------------------------------------------------------------------------------------|
|                                                            | <ul style="list-style-type: none"> <li>• Prior knowledge of neuroscience facilitated RBT practice</li> </ul>                           | <ul style="list-style-type: none"> <li>• Greater understanding principles of RBT and the importance</li> </ul>                                                                                                   |
|                                                            | <ul style="list-style-type: none"> <li>• RBT research viewed as barrier to implementation</li> </ul>                                   | <ul style="list-style-type: none"> <li>• Equipment used in research studies vs what is feasible</li> <li>• Populations in research studies vs clients treated</li> </ul>                                         |
|                                                            | <ul style="list-style-type: none"> <li>• Learning needs for RBT practice</li> </ul>                                                    | <ul style="list-style-type: none"> <li>• How to assess reactive balance control</li> <li>• How to implement RBT</li> <li>• Creative ways to incorporate it without high-tech equipment</li> </ul>                |
| 3. Reactive balance control is viewed as an advanced skill | <ul style="list-style-type: none"> <li>• RBT not appropriate for lower-functional clients (low motor or cognitive function)</li> </ul> | <ul style="list-style-type: none"> <li>• Priority of restoring function (ADLs)</li> <li>• RBT at the end of treatment program</li> <li>• ‘Running out of time’</li> <li>• RBT as preventative therapy</li> </ul> |
|                                                            | <ul style="list-style-type: none"> <li>• Applying RBT at home is not appropriate</li> </ul>                                            |                                                                                                                                                                                                                  |
|                                                            | <ul style="list-style-type: none"> <li>• RBT as preventative therapy</li> </ul>                                                        | <ul style="list-style-type: none"> <li>• Need for RBT earlier in therapy</li> </ul>                                                                                                                              |
|                                                            | <ul style="list-style-type: none"> <li>• Safety harnesses</li> </ul>                                                                   | <ul style="list-style-type: none"> <li>• Concern of safety and lower-functioning clients</li> <li>• Limitations to using harness</li> </ul>                                                                      |



|                                     |                                                                                           |                                                                                                                                                                                              |
|-------------------------------------|-------------------------------------------------------------------------------------------|----------------------------------------------------------------------------------------------------------------------------------------------------------------------------------------------|
|                                     | <ul style="list-style-type: none"> <li>Human resources</li> </ul>                         | <ul style="list-style-type: none"> <li>Use of assistants in place of safety harness</li> <li>Alleviating safety concerns</li> <li>Access to an assistant and role of an assistant</li> </ul> |
| 4. RBT experience builds confidence | <ul style="list-style-type: none"> <li>Apprehensive/fearful about RBT</li> </ul>          | <ul style="list-style-type: none"> <li>External perturbations</li> </ul>                                                                                                                     |
|                                     | <ul style="list-style-type: none"> <li>Increased self-confidence with practice</li> </ul> |                                                                                                                                                                                              |
|                                     | <ul style="list-style-type: none"> <li>Trust between therapist and client</li> </ul>      |                                                                                                                                                                                              |
|                                     | <ul style="list-style-type: none"> <li>Client's feelings of RBT</li> </ul>                | <ul style="list-style-type: none"> <li>Apprehensive/fearful/anxious</li> <li>Benefits and enjoyment</li> <li>Self-efficacy/sense of achievement</li> </ul>                                   |
|                                     | <ul style="list-style-type: none"> <li>Team support</li> </ul>                            | <ul style="list-style-type: none"> <li>Facilitator</li> <li>Barrier due to attitudes of RBT</li> </ul>                                                                                       |
